21. Regitz-Zagrosek V, Erdmann J, Wellnhofer E, Raible J, Fleck E. Novel mutation in the alpha-tropomyosin gene and transition from hypertrophic to hypocontractile dilated cardiomyopathy. *Circulation* 2000;**102**:E112–E116.
22. Kofflard MJ, Ten Cate FJ, van der Lee C, van Domburg RT. Hypertrophic cardiomyopathy in a large community-based population: clinical outcome and identification of risk factors for sudden cardiac death and clinical deterioration. *J Am Coll Cardiol* 2003;**41**:987–993.
23. Elliott PM, Gimeno JR, Tome MT, Shah J, Ward D, Thaman R, Mogensen J, McKenna WJ. Left ventricular outflow tract obstruction and sudden death risk in patients with hypertrophic cardiomyopathy. *Eur Heart J* 2006;**27**:1933–1941.
24. Prasad K, Williams L, Campbell R, Elliott PM, McKenna WJ, Frenneaux M. Episodic syncope in hypertrophic cardiomyopathy—evidence for inappropriate vasodilation. *Heart* 2008;**94**:1312–1317.
25. Sadoul N, Prasad K, Elliott PM, Bannerjee S, Frenneaux MP, McKenna WJ. Prospective prognostic assessment of blood pressure response during exercise in patients with hypertrophic cardiomyopathy. *Circulation* 1997;**96**:2987–2991.
26. Daida H, Allison TG, Squires RW, Miller TD, Gau GT. Peak exercise blood pressure stratified by age and gender in apparently healthy subjects. *Mayo Clin Proc* 1996;**71**:445–452.
27. Kennedy HL, Whitlock JA, Sprague MK, Kennedy LJ, Buckingham TA, Goldberg RJ. Long-term follow-up of asymptomatic healthy subjects with frequent and complex ventricular ectopy. *N Engl J Med* 1985;**312**:193–197.
28. Epstein AE, Dimarco JP, Ellenbogen KA, Estes NA III, Freedman RA, Gettes LS, Gillinov AM, Gregoratos G, Hammill SC, Hayes DL, Hlatky MA, Newby LK, Page RL, Schoenfeld MH, Silka MJ, Stevenson LW, Sweeney MO. ACC/AHA/HRS 2008 guidelines for device-based therapy of cardiac rhythm abnormalities: executive summary. *Heart Rhythm* 2008;**5**:934–955.
29. Maron BJ, Spirito P. Implantable defibrillators and prevention of sudden death in hypertrophic cardiomyopathy. *J Cardiovasc Electrophysiol* 2008;**19**:1118–1126.
30. Sherrid MV, Daubert JP. Risks and challenges of implantable cardioverter-defibrillators in young adults. *Prog Cardiovasc Dis* 2008;**51**:237–263.
31. Papavassiliu T, Schnabel P, Schroder M, Borggrefe M. CMR scarring in a patient with hypertrophic cardiomyopathy correlates well with histological findings of fibrosis. *Eur Heart J* 2005;**26**:2395.
32. Moon JC, McKenna WJ, McCrohon JA, Elliott PM, Smith GC, Pennell DJ. Toward clinical risk assessment in hypertrophic cardiomyopathy with gadolinium cardiovascular magnetic resonance. *J Am Coll Cardiol* 2003;**41**:1561–1567.
33. Adabag AS, Maron BJ, Appelbaum E, Harrigan CJ, Buros JL, Gibson CM, Lesser JR, Hanna CA, Udelson JE, Manning WJ, Maron MS. Occurrence and frequency of arrhythmias in hypertrophic cardiomyopathy in relation to delayed enhancement on cardiovascular magnetic resonance. *J Am Coll Cardiol* 2008;**51**:1369–1374.
34. Pelliccia A, Zipes DP, Maron BJ. Bethesda Conference #36 and the European Society of Cardiology Consensus Recommendations revisited: a comparison of U.S. and European criteria for eligibility and disqualification of competitive athletes with cardiovascular abnormalities. *J Am Coll Cardiol* 2008;**52**:1990–1996.

## CARDIOVASCULAR FLASHLIGHT

doi:10.1093/eurheartj/ehp334

Online publish-ahead-of-print 17 August 2009

### Frightening ST-segment elevation

Raphaël Pedro Martins<sup>1,4\*</sup>, Alban-Elouen Baruteau<sup>1,4</sup>, and Jean-Claude Daubert<sup>1,4</sup>

<sup>1</sup>Département de Cardiologie et Maladies Vasculaires, Centre Cardio-Pneumologique, Hôpital de Pontchaillou, CHU de Rennes, 2 rue Henri Le Guilloux, Rennes F-35000, France; <sup>2</sup>Université de Rennes 1, LTSI, Rennes F-35000, France; <sup>3</sup>INSERM, CIC-IT 804, Rennes F-35000, France; and <sup>4</sup>INSERM, U642, Rennes F-35000, France

\* Corresponding author. Tel: +33 299 282 525, Fax: +33 299 282 510, Email: raphael-martins@voila.fr

A 69-year-old woman was referred to our department for an acute chest pain associated with a circumferential frightening ST-segment elevation on 12-lead electrocardiogram (Panel A) and increased level of troponin I at 37 ng/mL ( $N < 0.10$  ng/mL). Coronary angiography was normal and there were no electrolytic disturbances.

The patient was just diagnosed having an extra nasal T/natural killer cell (T/NK) lymphoma with pulmonary, jejunal and colic metastasis. Jejunal biopsy showed necrotizing vasculitis with perivascular lymphocytic infiltration (Panel B).

Cardiac magnetic resonance imaging (MRI) revealed apicolateral mid-myocardial delayed contrast enhancement sparing the subendocardium on T1-weighted inversion recovery sequences after gadolinium injection (Panel C, arrow). Cine-MRI showed, as transthoracic echocardiography previously did, an apicolateral hypokinesia with severely depressed left ventricular ejection fraction at 25%.

Despite chemotherapy and before myocardial biopsy could be done, the patient died.

Two diagnoses can be hypothesized: a myocardial localization of T/NK lymphoma or a myocardial neoplastic necrotizing vasculitis.

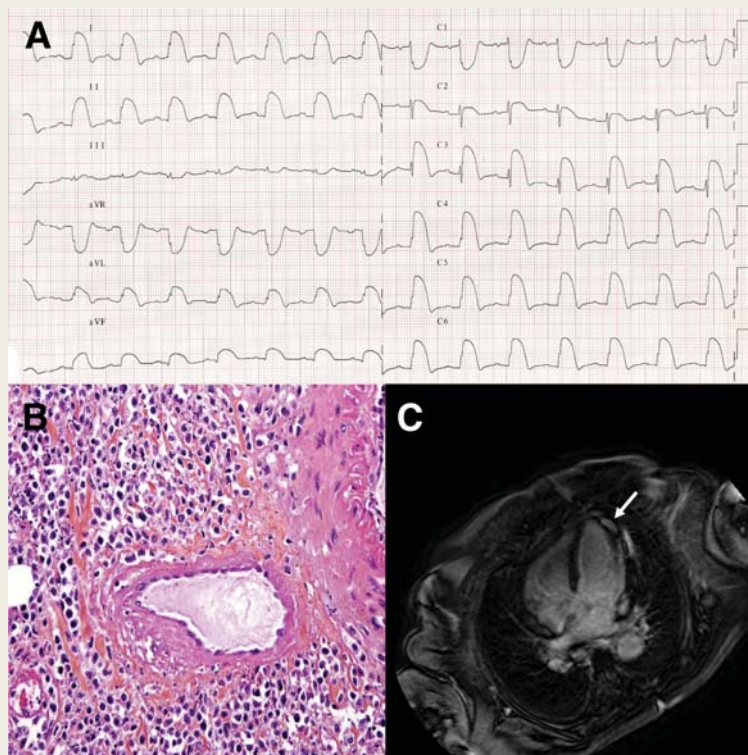

Source: https://academic.oup.com/eurheartj/article-pdf/30/21/2598/17890112/ehp334.pdf
